# Supplementary material
Source: Springer Nature journal article supplement (https://www.springermedizin.de/resource/supplementary/12888_2013_1864_MOESM2_ESM.pdf/9480402)
Supplement: MOESM2 [file 9480402]

Assessed for eligibility (n=157)

Did not meet entry criteria (n=56)

Met exclusion criteria (n=32)

Declined to participate (n=22)

- Declined Haldon Treatment (n=11)
- Admitted to other ED unit (n=4)
- Incomplete referral (n=1)
- Reason unknown (n=6)

Entered DBT program (n=47)

Completed treatment (n=34)

Dropped out from treatment (n=13)

- Declined further weight restoration (n = 9)
- Did not engage with treatment (n=3)
- Motivated to continue weight restoration in outpatient setting (n=1)

Completed discharge questionnaire assessments (n=21)

Intent-to-treat BMI assessment (n=47)  
Intent-to-treat questionnaire assessment (n=37)

Completer BMI assessment (n=34)  
Completer questionnaire assessment (n=20)
